# Supplementary material for: Gene Arrangement Convergence, Diverse Intron Content, and Genetic Code Modifications in Mitochondrial Genomes of Sphaeropleales (Chlorophyta)
Source: PubMed Central journal article supplement (PMC4159012; doi:10.1093/gbe/evu172), 2014-08-08
Supplement: supp_evu172_Dispersed_repeats_S13.pdf [file supp_evu172_Dispersed_repeats_S13.pdf]

| Species                           | Repeat unit | # occurrences |
|-----------------------------------|-------------|---------------|
| <i>Chlorotetraedron incus</i>     | GTTTTAT     | 31            |
|                                   | TTGATT      | 101           |
|                                   | TATTTTT     | 103           |
|                                   | TTCTTT      | 106           |
|                                   | TTTTTGA     | 128           |
|                                   | TTTTGG      | 360           |
| <i>Chromochloris zofingiensis</i> | TGCTAT      | 30            |
|                                   | ATTATA      | 65            |
|                                   | AATTTTA     | 143           |
|                                   | AATTTA      | 449           |
| <i>Kirchneriella aperta</i>       | CTATTCT     | 27            |
|                                   | TTCATAT     | 28            |
|                                   | TTTATAT     | 44            |
|                                   | TTGTTTT     | 66            |
|                                   | ATTTAT      | 101           |
| <i>Neochloris aquatica</i>        | TTAATAA     | 25            |
|                                   | AATATTT     | 31            |
|                                   | TTAATT      | 98            |
| <i>Ourococcus multisporus</i>     | TTAATTA     | 58            |
|                                   | TTTTTAG     | 59            |
|                                   | TTGGTT      | 106           |
|                                   | TAATTA      | 136           |

|                                       |         |     |
|---------------------------------------|---------|-----|
| <i>Pseudomuriella schumacherensis</i> | TTAATT  | 183 |
|                                       | TTATTTT | 206 |
|                                       | TTTTATT | 220 |
|                                       | TTTTTAA | 304 |
|                                       | TTTTAT  | 385 |
|                                       | TTTTGG  | 75  |

Table S13. Small dispersed repeats in mitochondrial genomes of Sphaeropleales, detected by RepeatMasker (Smit et al. 1996-2010). Only elements longer than 5 bp and repeated more than 10 times within a genome are listed. Colors indicate elements found in more than one species.
