# Supplementary material for: Gene Arrangement Convergence, Diverse Intron Content, and Genetic Code Modifications in Mitochondrial Genomes of Sphaeropleales (Chlorophyta)
Source: PubMed Central journal article supplement (PMC4159012; doi:10.1093/gbe/evu172), 2014-08-08

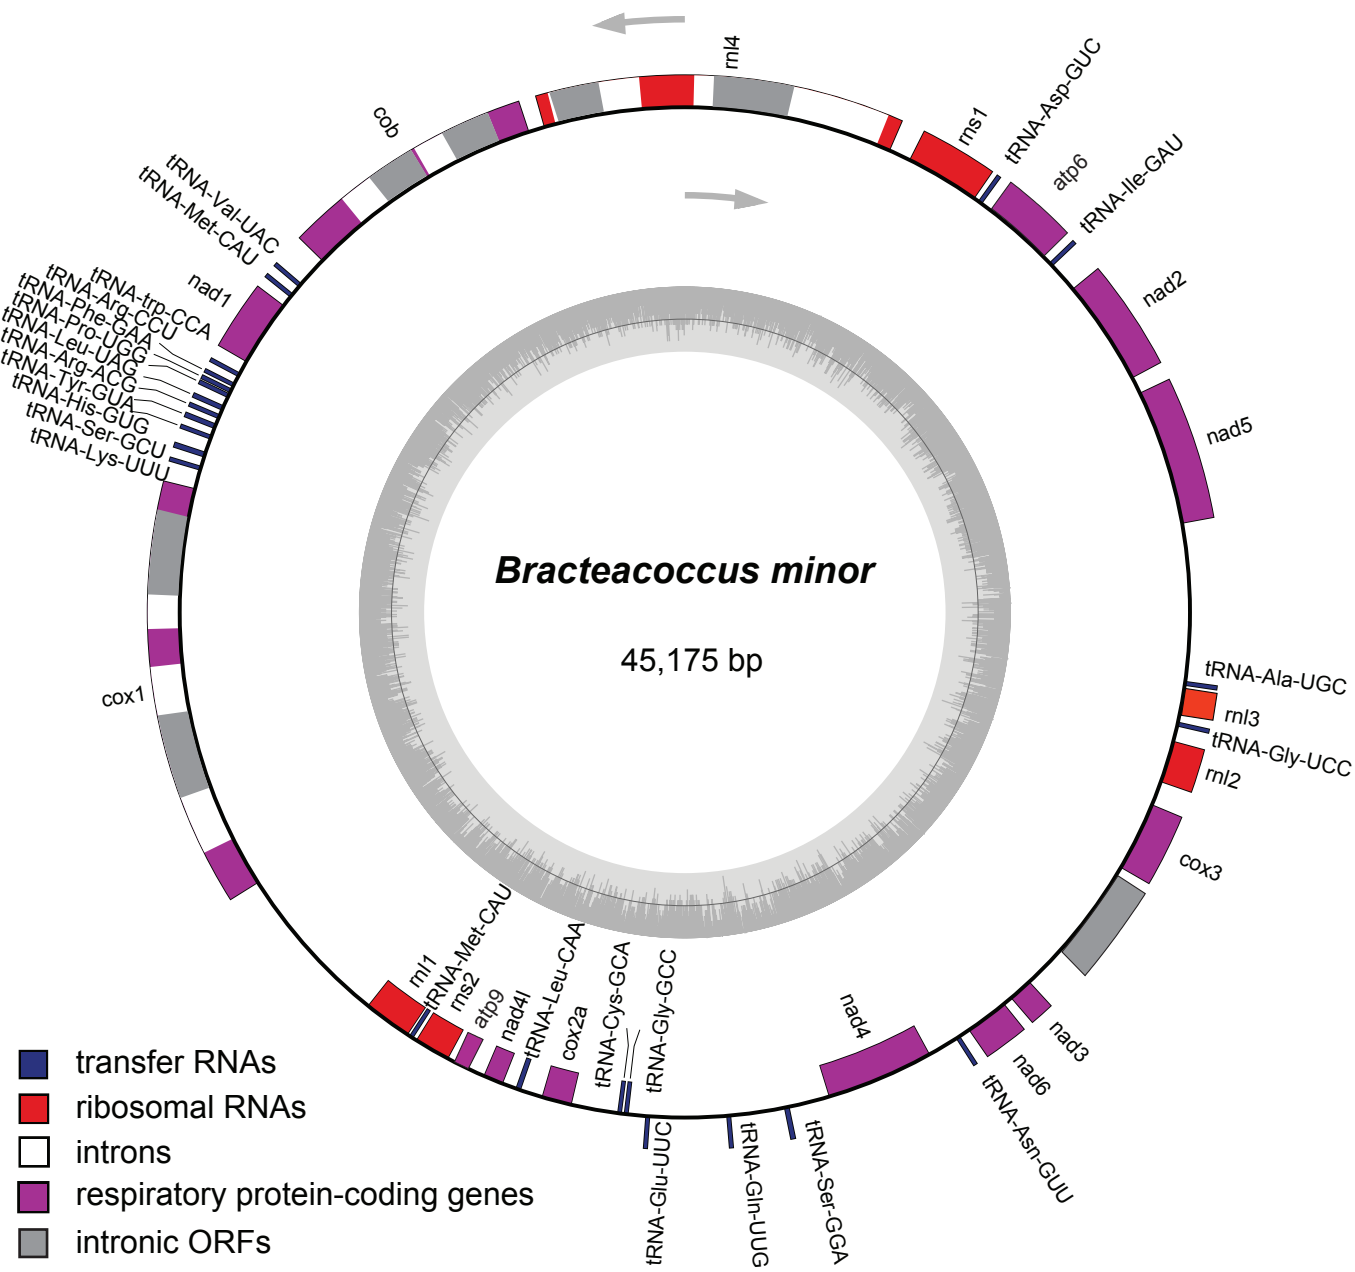

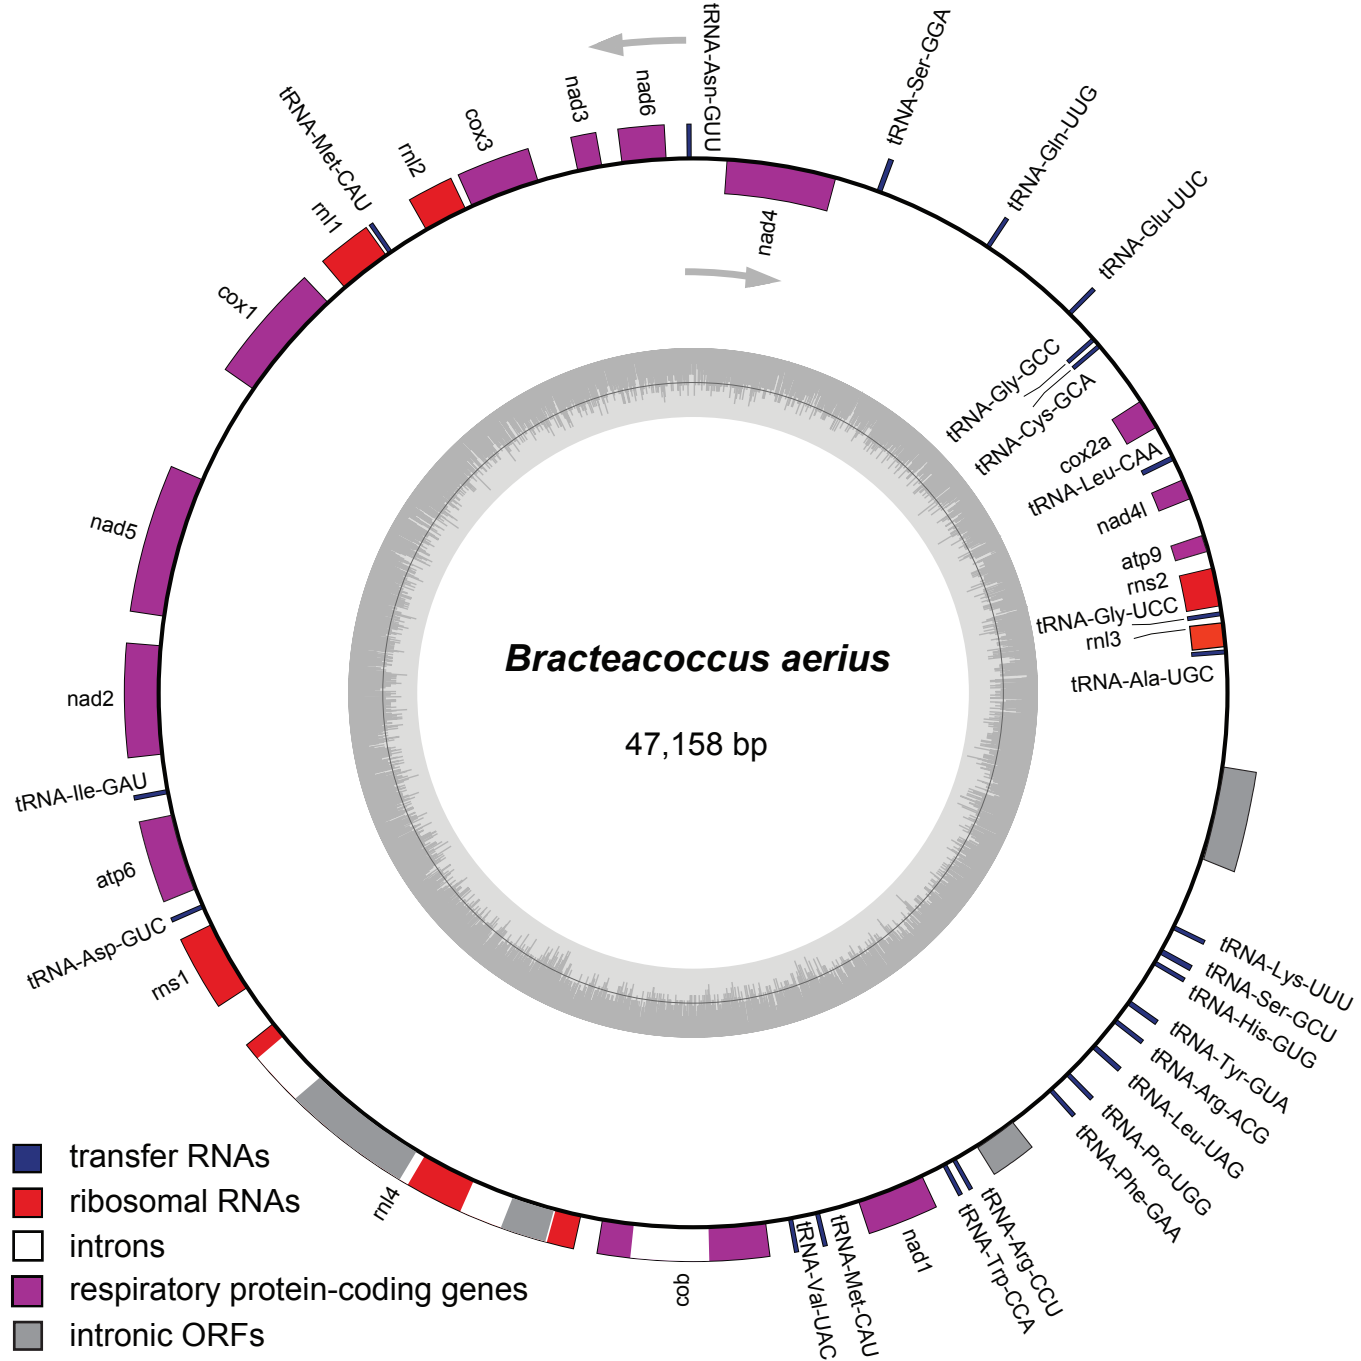

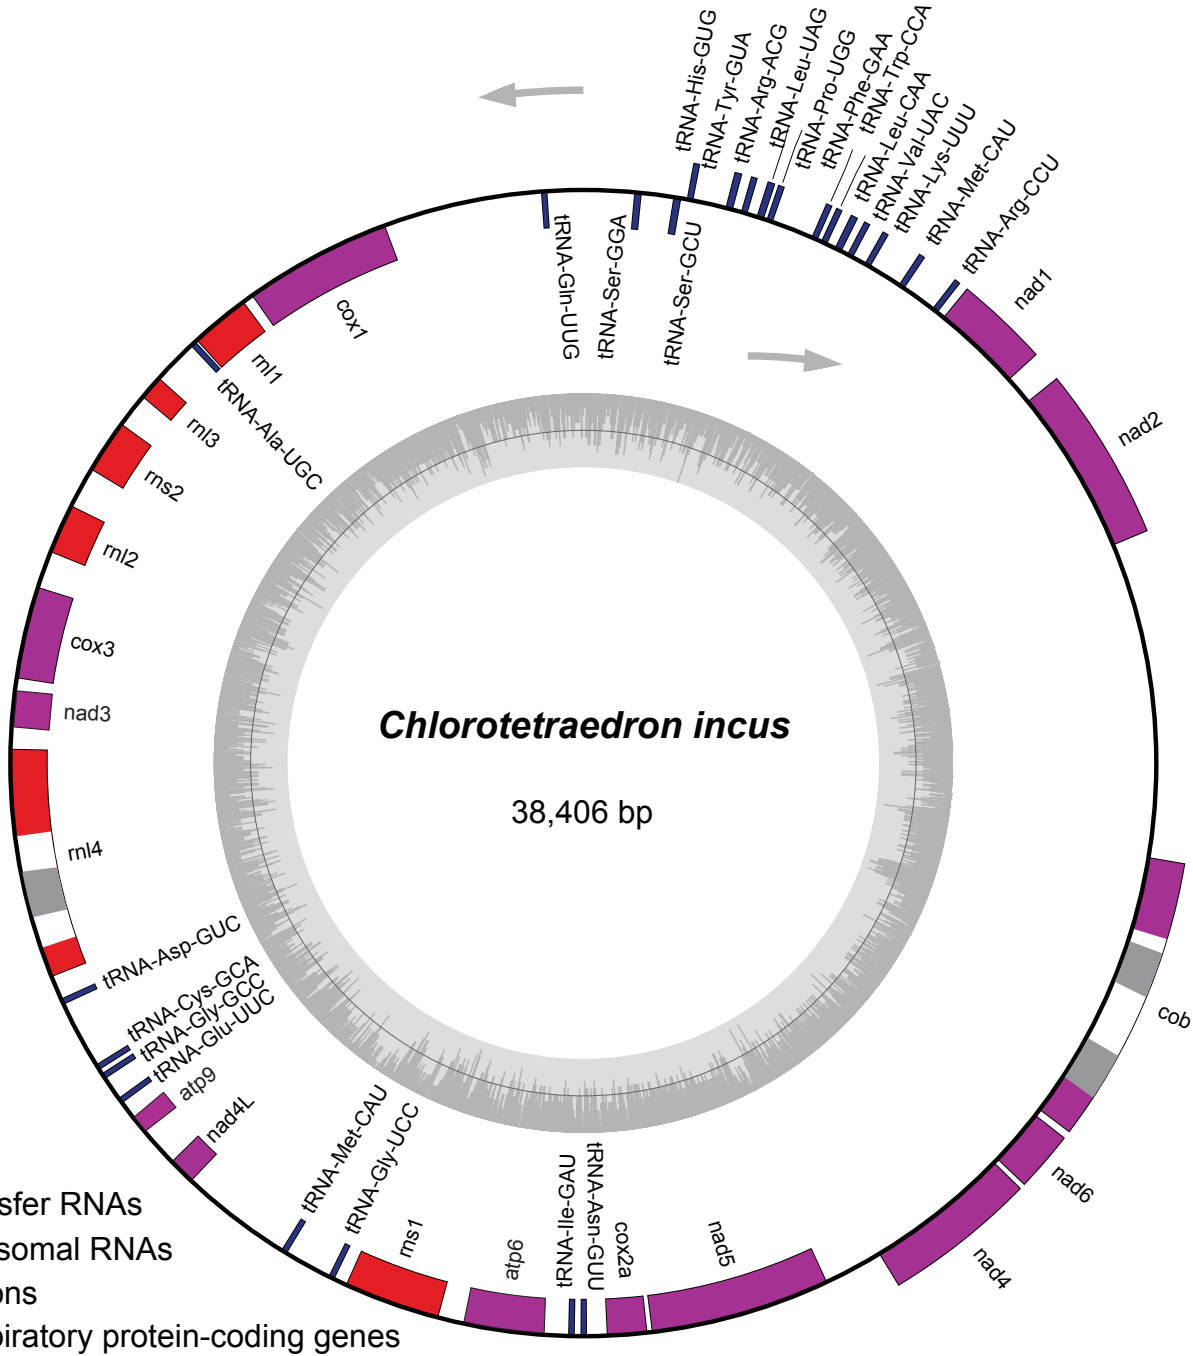

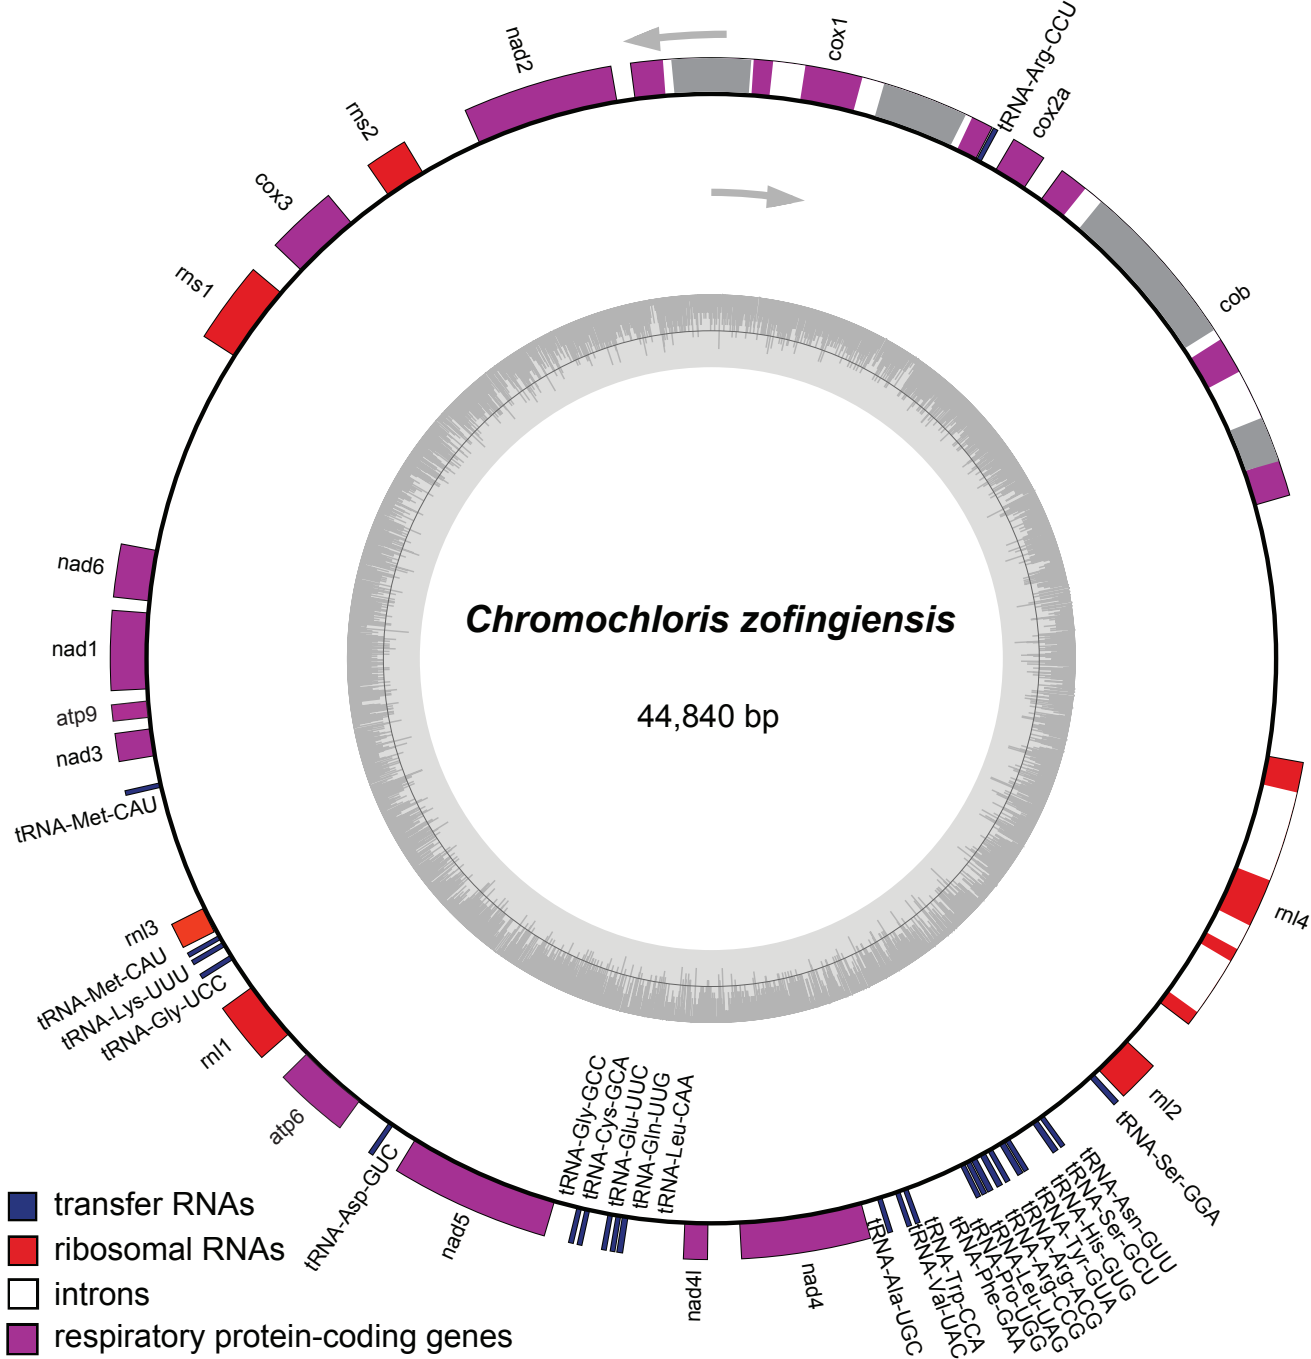

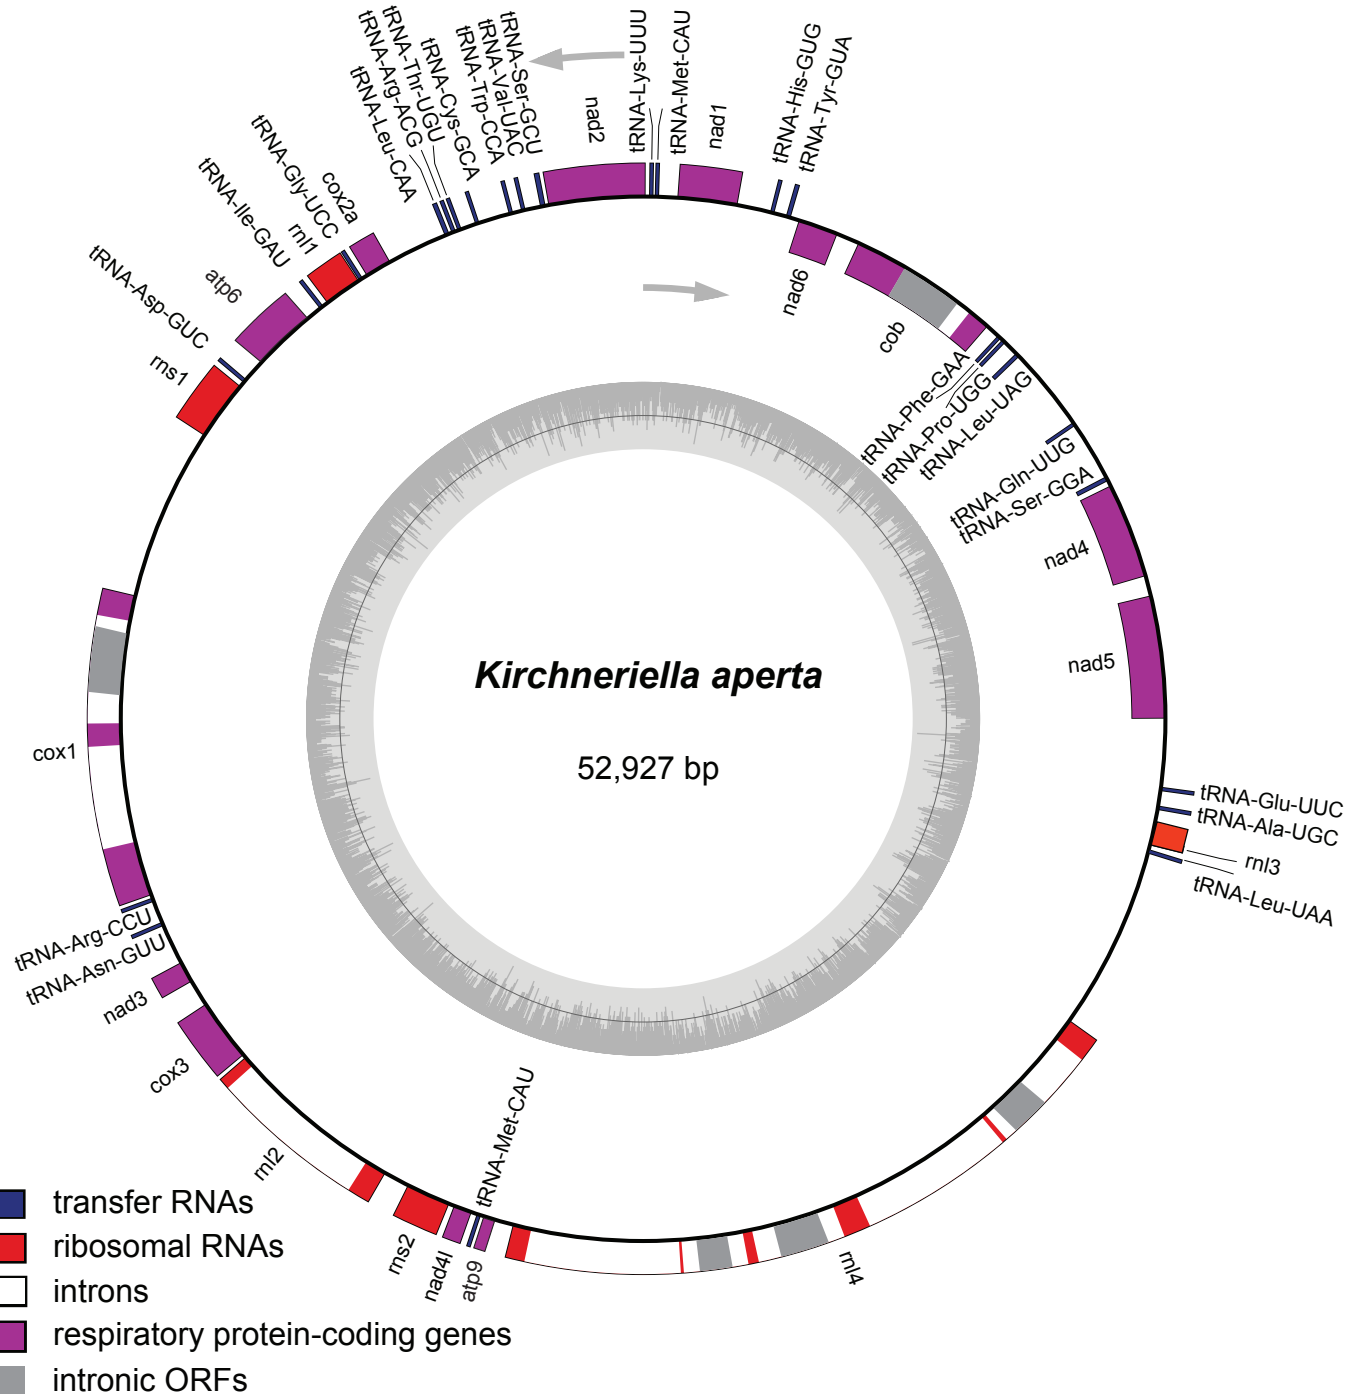

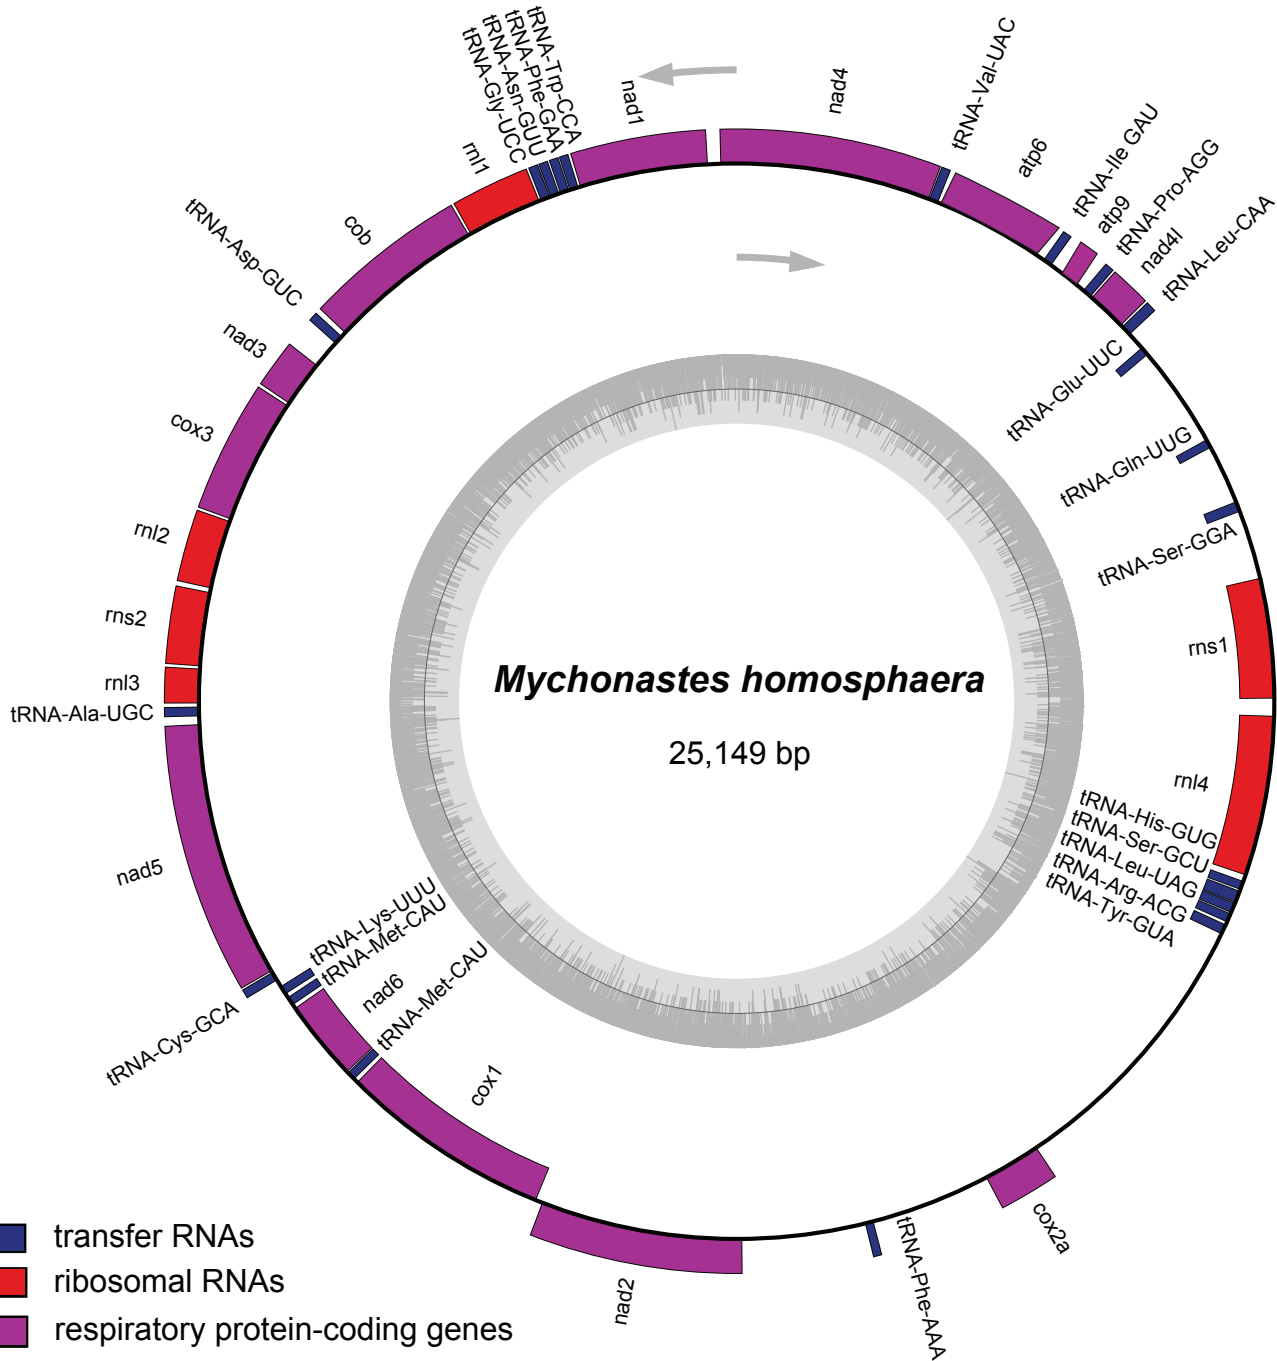

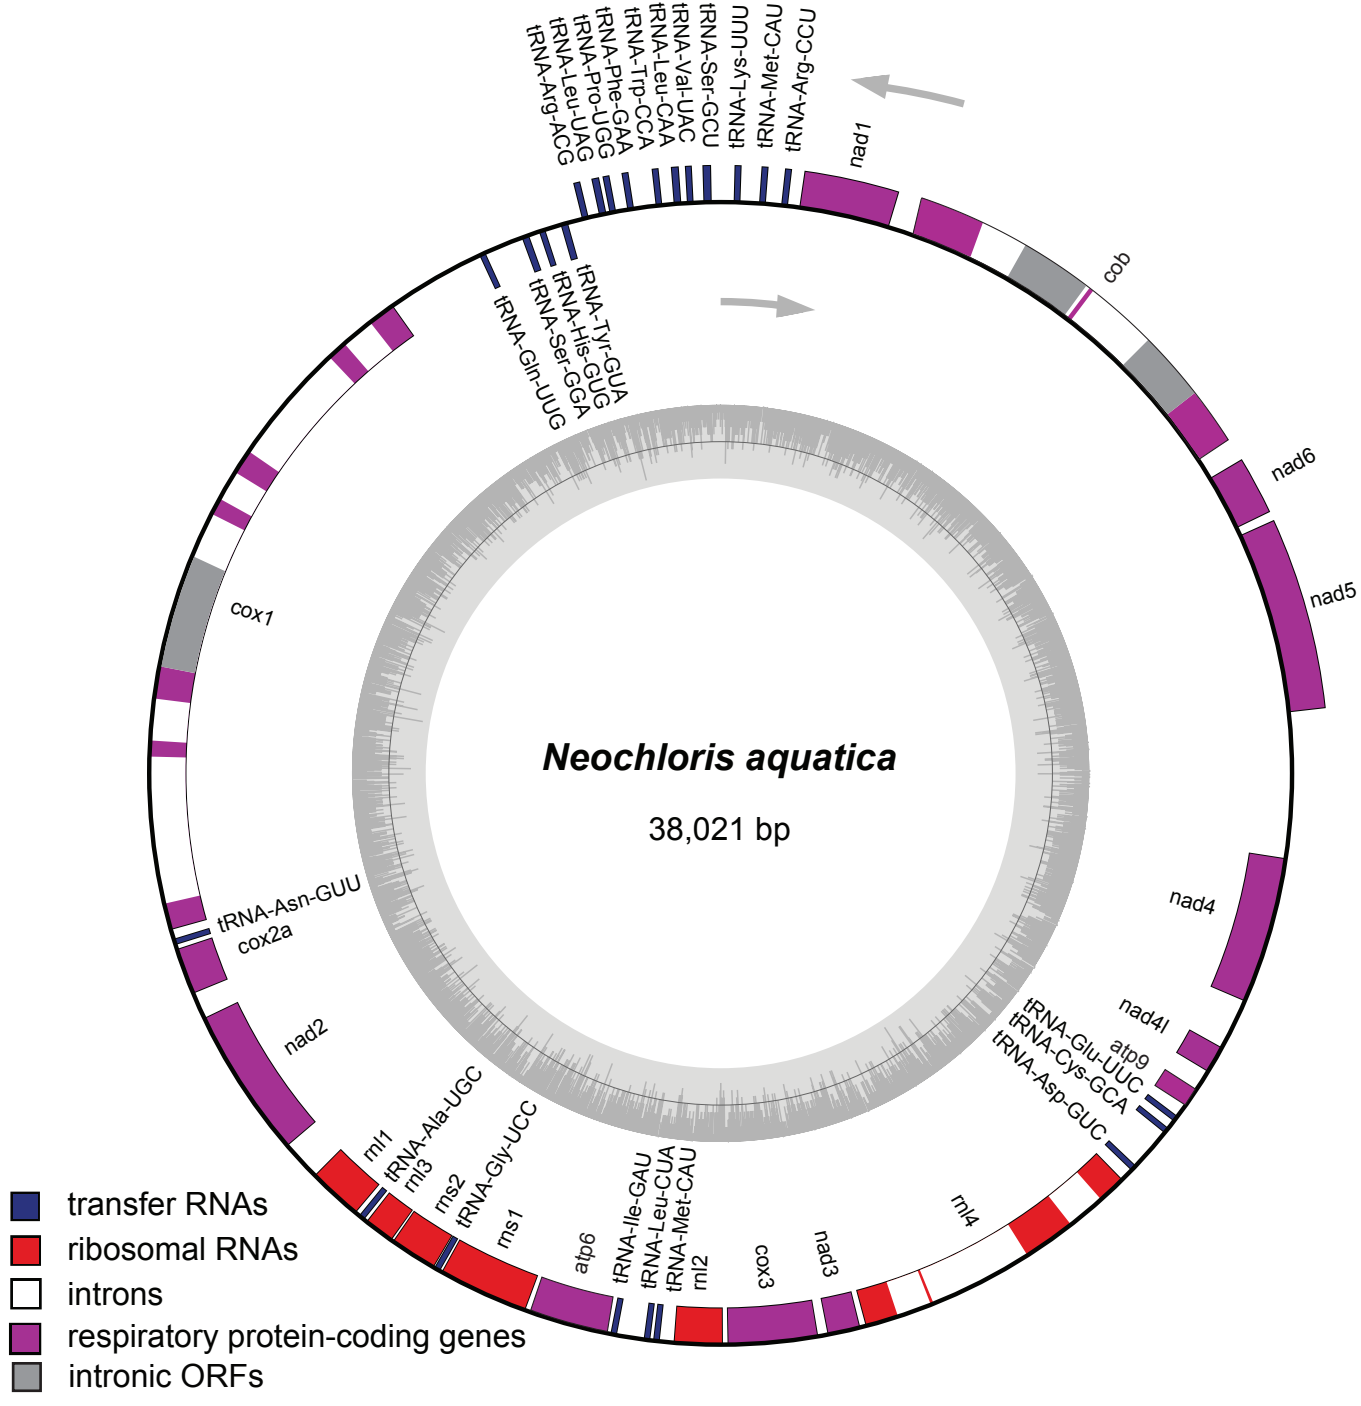

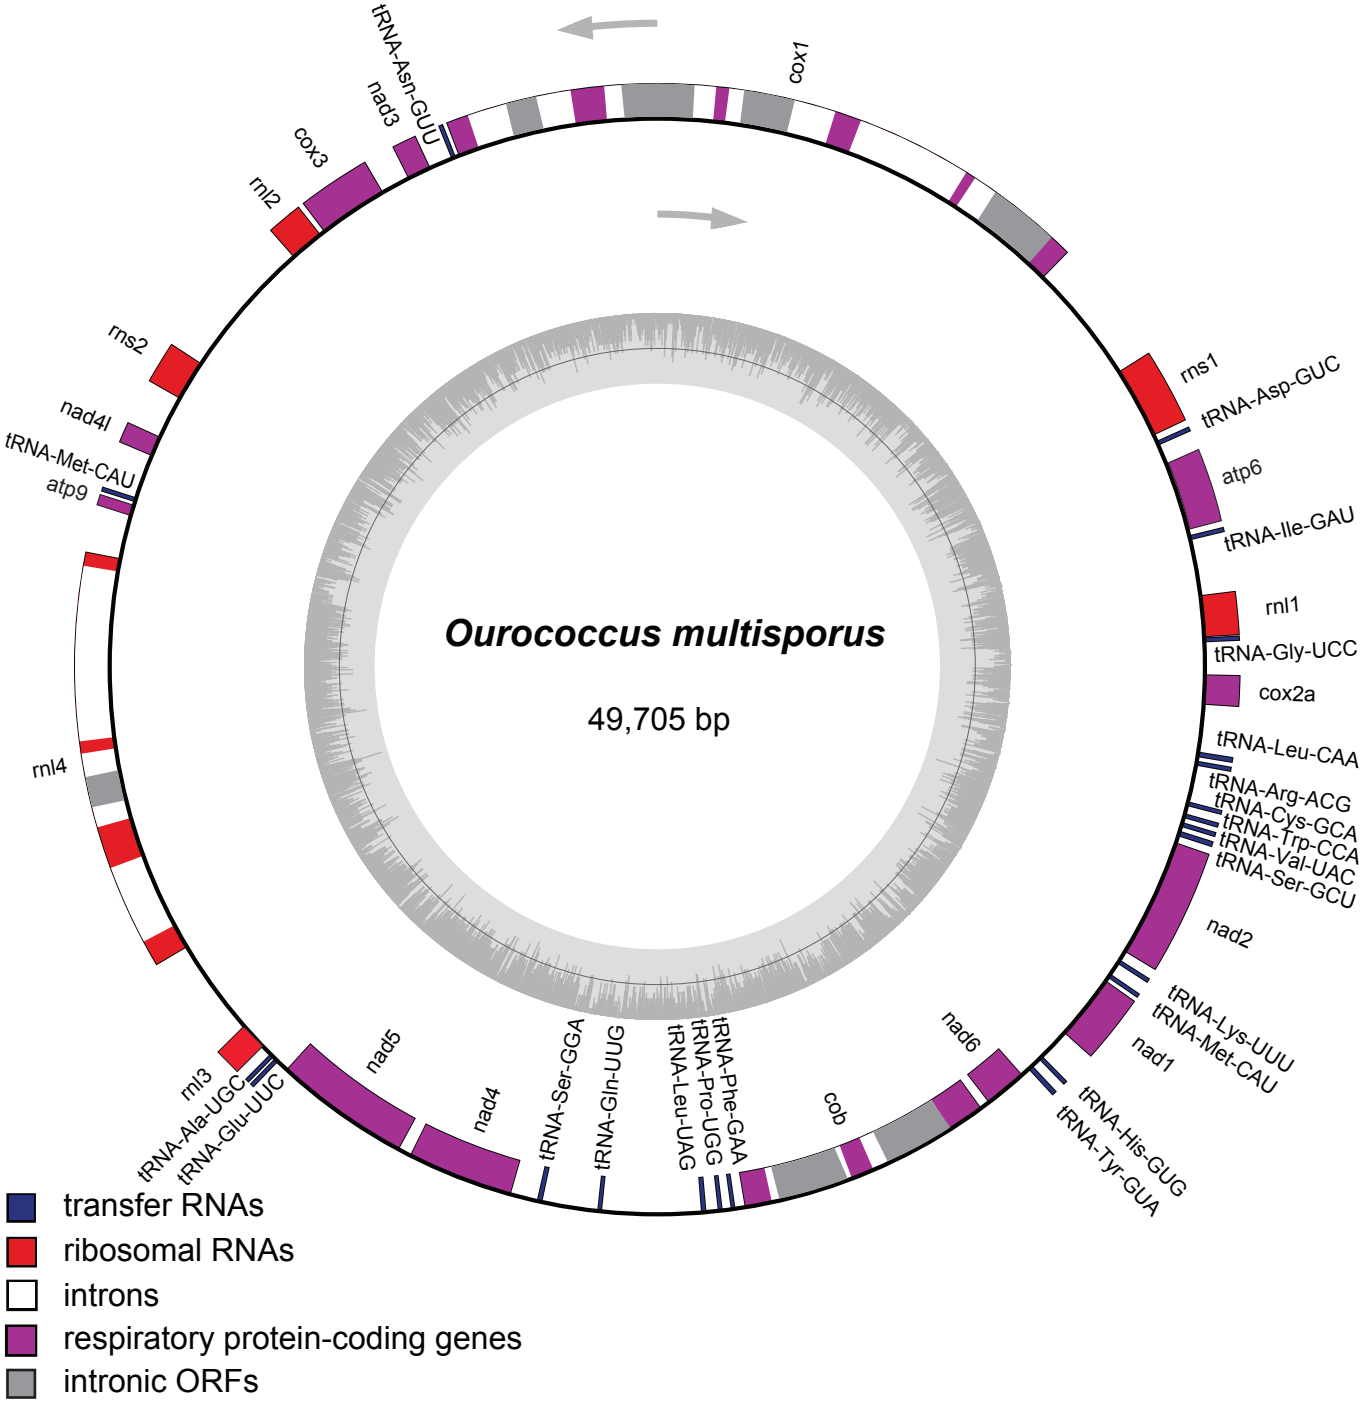



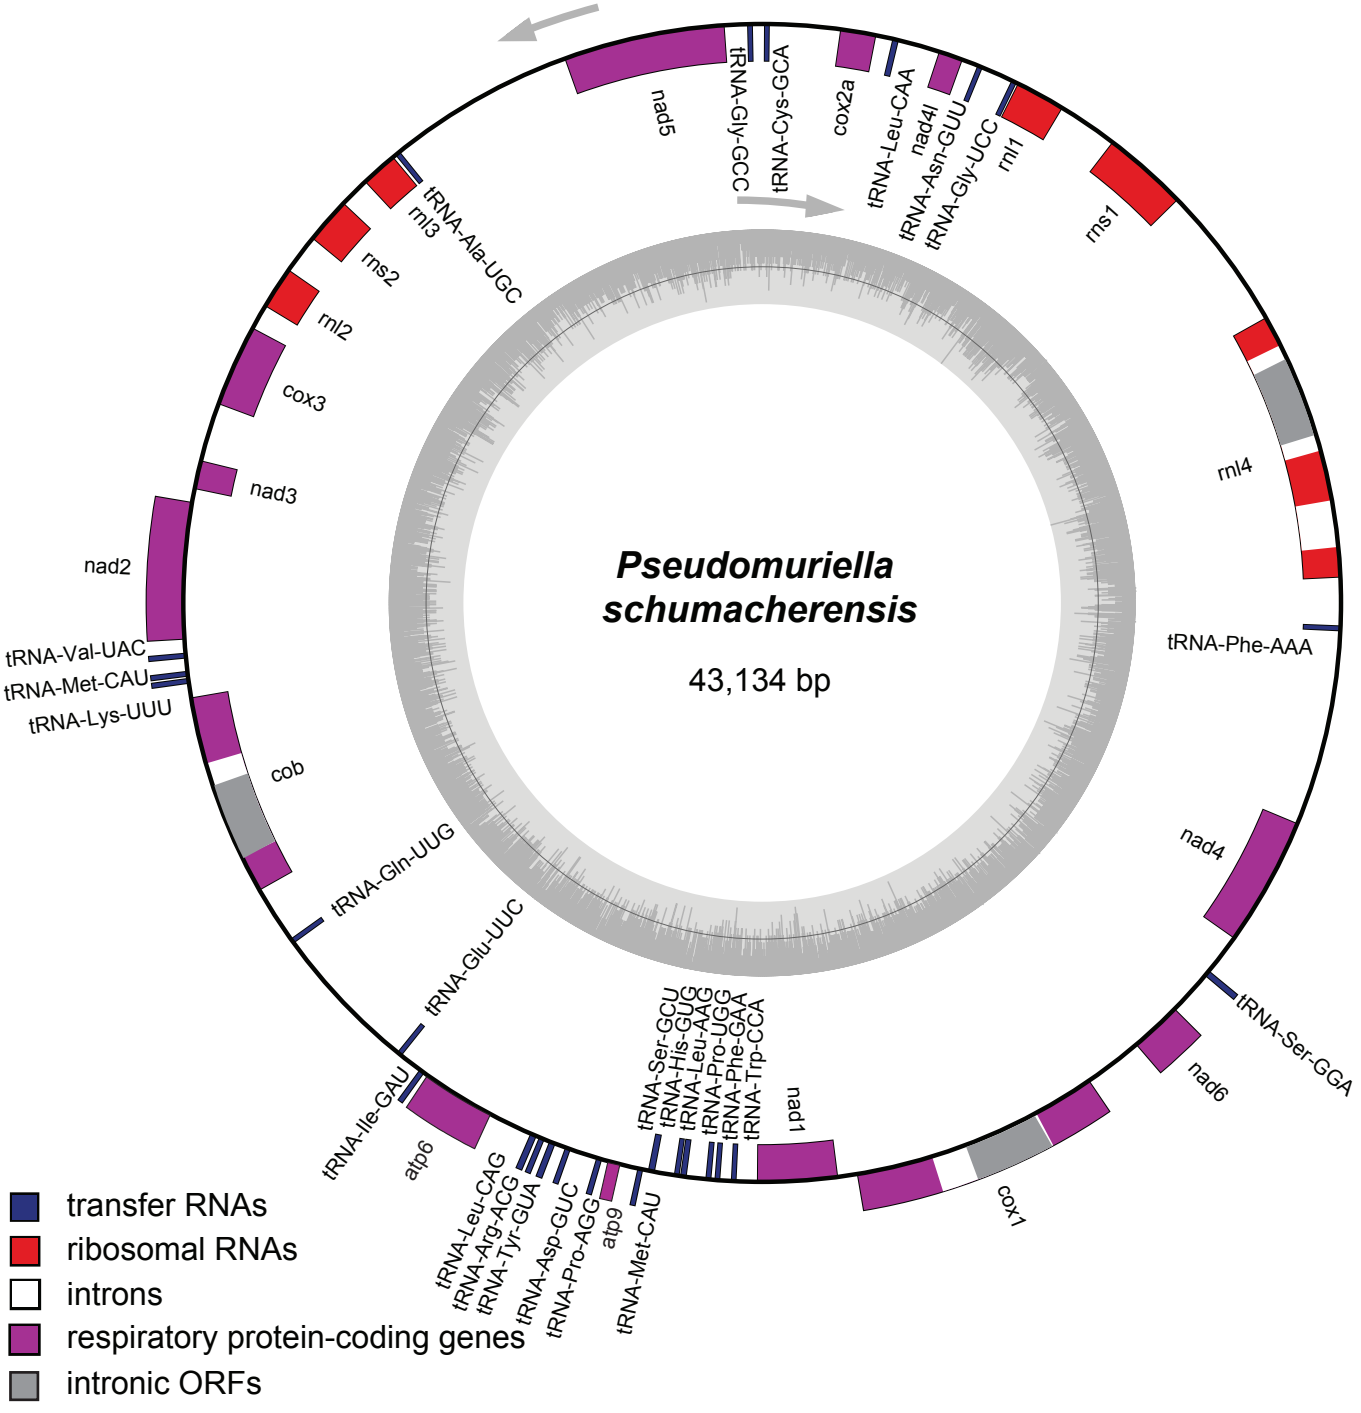

Supplement: supp_evu172_Fucikova_etal_S1-S9.pdf [file supp_evu172_Fucikova_etal_S1-S9.pdf]
