# Supplementary material for: Gene Arrangement Convergence, Diverse Intron Content, and Genetic Code Modifications in Mitochondrial Genomes of Sphaeropleales (Chlorophyta)
Source: PubMed Central journal article supplement (PMC4159012; doi:10.1093/gbe/evu172), 2014-08-08
Supplement: supp_evu172_TableS12_tRNAs.pdf [file supp_evu172_TableS12_tRNAs.pdf]

| tRNA type | Anticodon | <i>Bracteacoccus aereus</i> | <i>Bracteacoccus minor</i> | <i>Chlorotetraedron incus</i> | <i>Chromochloris zofingiensis</i> | <i>Kirchneriella aperta</i> | <i>Mychonastes homosphaera</i> | <i>Neochloris aquatica</i> | <i>Ourococcus multisporus</i> | <i>Pseudomuriella schumacherensis</i> | <i>Acutodesmus obliquus</i> | <i>Pediastrum duplex</i> | <i>Rotundella rotunda</i> | <i>Atractomorpha echinata</i> |
|-----------|-----------|-----------------------------|----------------------------|-------------------------------|-----------------------------------|-----------------------------|--------------------------------|----------------------------|-------------------------------|---------------------------------------|-----------------------------|--------------------------|---------------------------|-------------------------------|
| Ala       | UGC       | +                           | +                          | +                             | +                                 | +                           | +                              | +                          | +                             | +                                     | +                           | +                        | +                         | +                             |
| Arg       | ACG       | +                           | +                          | +                             | +                                 | +                           | +                              | +                          | +                             | +                                     | +                           | +                        | +                         | ?                             |
|           | CCU       | +                           | +                          | +                             | +                                 | +                           |                                | +                          |                               |                                       | +                           | ?                        | ?                         | ?                             |
|           | CCG       |                             |                            |                               | +                                 |                             |                                |                            |                               |                                       |                             | ?                        | ?                         | ?                             |
|           | UCU       |                             |                            |                               |                                   |                             |                                |                            |                               |                                       | +                           | ?                        | +                         | ?                             |
|           | GUU       | +                           | +                          | +                             | +                                 | +                           | +                              | +                          | +                             | +                                     | +                           | +                        | +                         | ?                             |
| Asn       | GUU       | +                           | +                          | +                             | +                                 | +                           | +                              | +                          | +                             | +                                     | +                           | +                        | +                         | ?                             |
| Asp       | GUC       | +                           | +                          | +                             | +                                 | +                           | +                              | +                          | +                             | +                                     | +                           | +                        | +                         | ?                             |
| Cys       | GCA       | +                           | +                          | +                             | +                                 | +                           | +                              | +                          | +                             | +                                     | +                           | +                        | +                         | ?                             |
| Gln       | UUG       | +                           | +                          | +                             | +                                 | +                           | +                              | +                          | +                             | +                                     | +                           | +                        | +                         | ?                             |
| Glu       | UUC       | +                           | +                          | +                             | +                                 | +                           | +                              | +                          | +                             | +                                     | +                           | +                        | +                         | ?                             |
| Gly       | GCC       | +                           | +                          | +                             | +                                 |                             |                                |                            |                               | +                                     |                             | +                        | +                         | ?                             |
|           | UCC       | +                           | +                          | +                             | +                                 | +                           | +                              | +                          | +                             | +                                     | +                           | +                        | +                         | +                             |
| His       | GUG       | +                           | +                          | +                             | +                                 | +                           | +                              | +                          | +                             | +                                     | +                           | +                        | +                         | +                             |
| Ile       | GAU       | +                           | +                          | +                             |                                   | +                           | +                              | +                          | +                             | +                                     | +                           | +                        | +                         | ?                             |
|           | UAU       |                             |                            |                               |                                   |                             |                                |                            |                               |                                       | +                           | ?                        | ?                         | ?                             |
| Leu       | UAG       | +                           | +                          | +                             | +                                 | +                           | +                              | +                          | +                             |                                       |                             | +                        | ?                         | +                             |
|           | CAA       | +                           | +                          | +                             | +                                 | +                           | +                              | +                          | +                             | +                                     | +                           | +                        | +                         | ?                             |
|           | UAA       |                             |                            |                               |                                   | +                           |                                |                            |                               |                                       |                             | ?                        | ?                         | ?                             |
|           | CUA       |                             |                            |                               |                                   |                             |                                | +                          |                               |                                       | +                           | +                        | ?                         | ?                             |
|           | AAG       |                             |                            |                               |                                   |                             |                                |                            |                               | +                                     | +                           | ?                        | +                         | ?                             |
|           | CAG       |                             |                            |                               |                                   |                             |                                |                            |                               | +                                     | +                           | ?                        | +                         | ?                             |
| Lys       | UUU       | +                           | +                          | +                             | +                                 | +                           | +                              | +                          | +                             | +                                     | +                           | +                        | +                         | ?                             |
| Met       | CAU       | +                           | +                          | +                             | +                                 | +                           | +                              | +                          | +                             | +                                     | +                           | +                        | +                         | ?                             |
|           | CAU       | +                           | +                          | +                             | +                                 | +                           | +                              | +                          | +                             | +                                     | +                           | +                        | +                         | ?                             |
| Phe       | GAA       | +                           | +                          | +                             | +                                 | +                           | +                              | +                          | +                             | +                                     | +                           | +                        | +                         | +                             |
|           | AAA       |                             |                            |                               |                                   |                             |                                |                            |                               | +                                     |                             | ?                        | ?                         | ?                             |
| Pro       | UGG       | +                           | +                          | +                             | +                                 | +                           |                                | +                          | +                             | +                                     | +                           | +                        | +                         | +                             |
|           | AGG       |                             |                            |                               |                                   |                             | +                              |                            |                               | +                                     |                             | ?                        | ?                         | ?                             |
| Ser       | GCU       | +                           | +                          | +                             | +                                 | +                           | +                              | +                          | +                             | +                                     | +                           | +                        | +                         | ?                             |
|           | GGA       | +                           | +                          | +                             | +                                 | +                           | +                              | +                          | +                             | +                                     | +                           | ?                        | +                         | ?                             |
|           | UGA       |                             |                            |                               |                                   |                             |                                |                            |                               |                                       |                             |                          |                           | +                             |
| Thr       | UGU       |                             |                            |                               |                                   | +                           |                                |                            |                               |                                       |                             | ?                        | ?                         | ?                             |
| Tyr       | GUA       | +                           | +                          | +                             | +                                 | +                           | +                              | +                          | +                             | +                                     | +                           | +                        | +                         | ?                             |
| Trp       | CCA       | +                           | +                          | +                             | +                                 | +                           | +                              | +                          | +                             | +                                     | +                           | +                        | +                         | +                             |
| Val       | UAC       | +                           | +                          | +                             | +                                 | +                           | +                              | +                          | +                             | +                                     | +                           | +                        | +                         | ?                             |

Table S12. Transfer RNA genes present in the mitochondrial genomes of Sphaeropleales. Question marks (?) indicate unknown presence/absence in partially sequenced genomes. Colors highlight tRNAs corresponding to the UAG codon (standard stop codon, purple) and the UCA codon (stop codon in most Sphaeropleales, blue). *Acutodesmus obliquus* is a synonym of *Scenedesmus obliquus*.
